# Supplementary material
Source: PubMed Central journal article supplement (PMC5407729)

## **FIGURE LEGENDS FOR SUPPLEMENTARY RESULTS**

### **Supplementary Figure 1.**

Rats were treated with SS-31 (2 mg/kg/day) or saline for 1.5 months starting 1 month after acute ischemia. Individual western blots from all four animals are shown for interleukin-18 (IL-18), interleukin-1 $\beta$  (IL-1 $\beta$ ), tumor necrosis factor- $\alpha$  (TNF- $\alpha$ ), transforming growth factor- $\beta$  (TGF- $\beta$ ), and vascular endothelial growth factor (VEGF) at 1 month (1M), 2.5 months (2.5M), and 9 months (9M) after acute ischemia.

### **Supplementary Figure 2.**

Representative electron micrographs showing glomerular endothelial cell mitochondria from saline versus SS-31 rats at 2.5M after ischemia, compared to normal rat. Normal endothelial mitochondria are elongated with dense cristae membranes and dark matrix (A). 2.5 months after ischemia, significant degenerative changes were still found in glomerular endothelial cells, with loss of cristae membranes and matrix density, and evidence of rupture of the outer membrane (B). These degenerative changes were abolished by 6 weeks treatment with SS-31 (C).

**Figure S1**

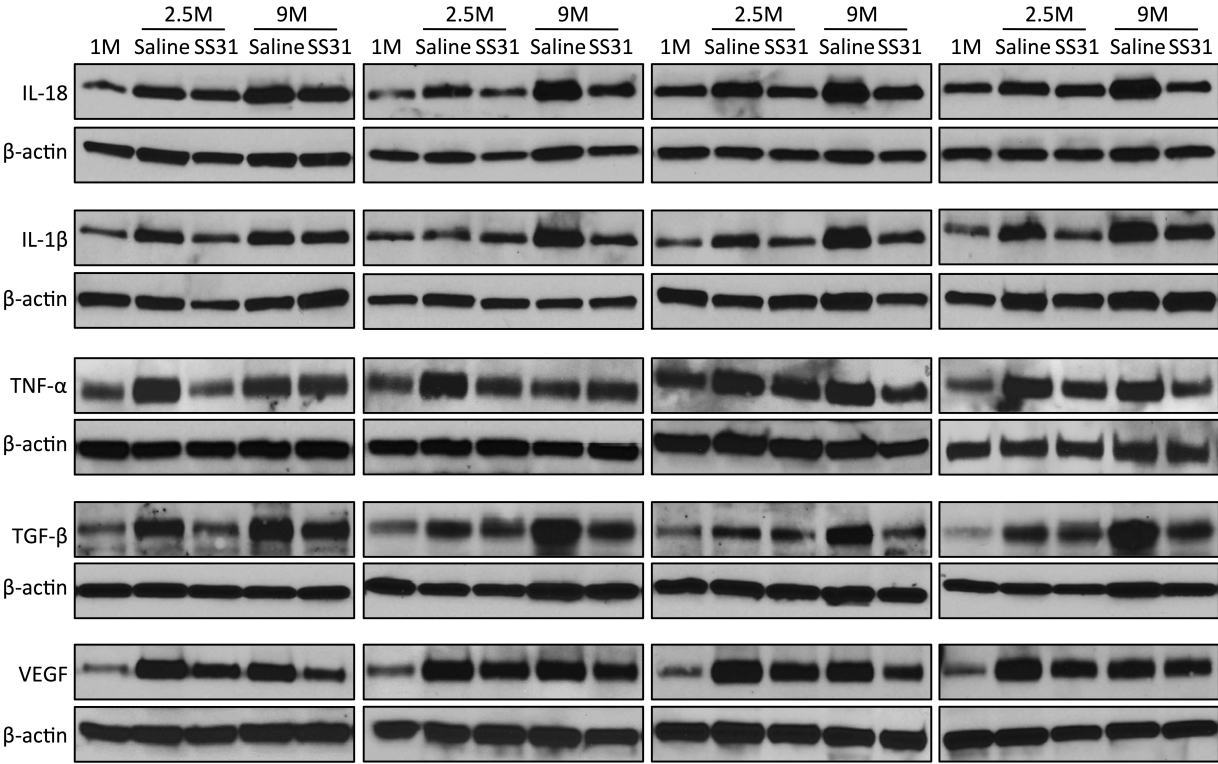

Figure S2

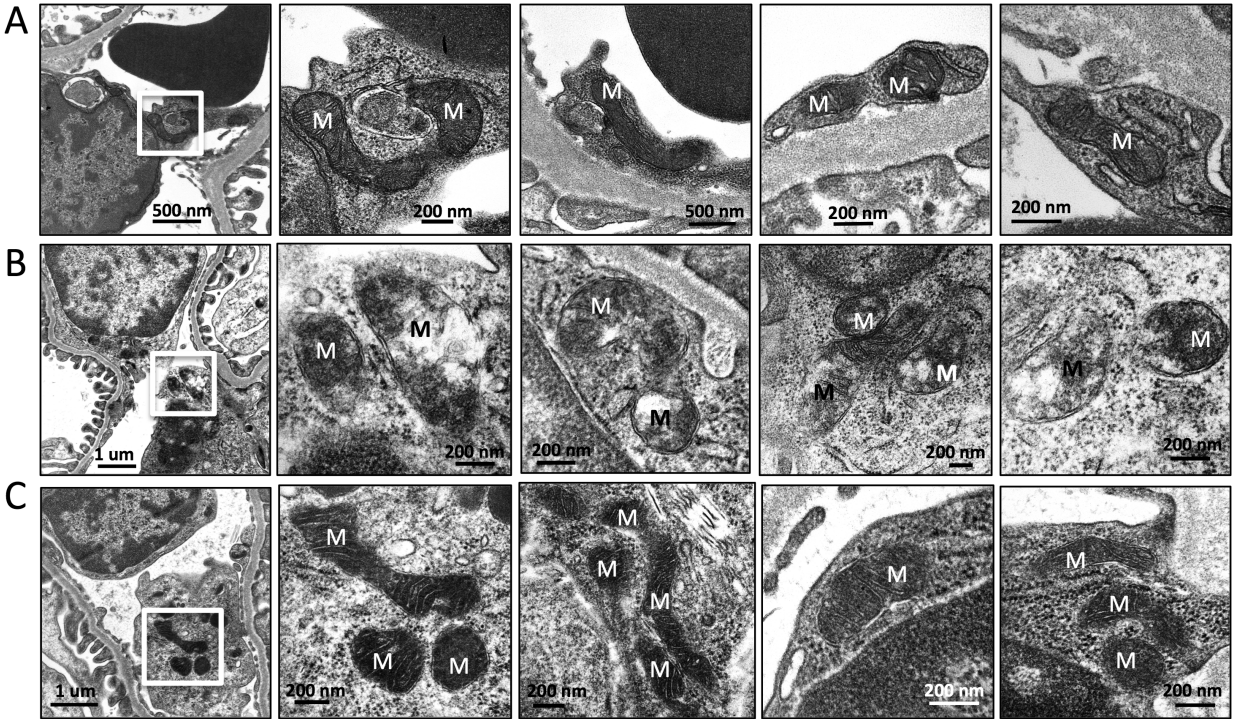

Supplement: ASN.2016070761SupplementaryData.pdf [file ASN.2016070761SupplementaryData.pdf]
